# Supplementary material for: The potential of SCUBE-1 levels as a biomarker for placental malfunction in preeclampsia
Source: Research Square preprint supplement (doi:10.21203/rs.3.rs-3958958/v1), 2024-02-19
Supplement: Supplementary file 1 [file 09e6c2125ed87ea7f03d0175.docx]

Table 3: Cut-off point analysis of SCUBE-1 values to determine preeclampsia

|  | Cut point | AUC | P | Sensivity (%) | 95% CI | Specifity (%) | 95% CI |
| --- | --- | --- | --- | --- | --- | --- | --- |
| SCUBE-1 | >95,92 | 0,716 [0,61-0,81] | <0.001 | 50,00 | 34,9-65,1 | 91,30 | 79,2-97,6 |
