# Supplementary material for: The potential of SCUBE-1 levels as a biomarker for placental malfunction in preeclampsia
Source: Research Square preprint supplement (doi:10.21203/rs.3.rs-3958958/v1), 2024-02-19
Supplement: Supplementary file 2 [file 4478f07dcac8fded9955994b.docx]

| Table 1: The Sociodemographic and obstetric characteristics of the study participants | | | |
| --- | --- | --- | --- |
|  | **With preeclampsia**  **(n = 46)** | **With normal blood pressure**  **(n = 46)** | **P** |
| **Maternal age (years) (median [25%-75%])** | 28 [22,75-35,25] | 26 [22-30] | 0.108 |
| **Body mass index (kg/m2) (median [25%-75%])** | 30,26 [29,67-32,11] | 28,67 [28,46-30,99] | 0.099 |
| **Gestational age (weeks)** | 36 [33,75-37,25] | 35 [33-38] | 0.534 |
| **Gravida (median [25%-75%])** | 2 [1-4] | 3 [1-3,25] | 0.987 |
| **Parity (median [25%-75%])** | 1 [0-2] | 2 [0-2] | 0.700 |
| **Systolic blood pressure (mmHg) (median [25%-75%])** | 145 [128-158] | 115,50 [110-120] | < 0.001 |
| **Diastolic blood pressure (mmHg) (median [25%-75%])** | 88 [80-95,75] | 71,50 [70-80] | < 0.001 |
