# Supplementary material for: The potential of SCUBE-1 levels as a biomarker for placental malfunction in preeclampsia
Source: Research Square preprint supplement (doi:10.21203/rs.3.rs-3958958/v1), 2024-02-19
Supplement: Supplementary file 3 [file f46501f1937f5650985a14b7.docx]

| Table 1: The Sociodemographic and obstetric characteristics of the study participants | | | |
| --- | --- | --- | --- |
|  | **With preeclampsia**  **(n = 46)** | **With normal blood pressure**  **(n = 46)** | **P** |
| **Maternal age (years) (median [25%-75%])** | 28 [22,75-35,25] | 26 [22-30] | 0.108 |
| **Body mass index (kg/m2) (median [25%-75%])** | 30,26 [29,67-32,11] | 28,67 [28,46-30,99] | 0.099 |
| **Gestational age (weeks)** | 36 [33,75-37,25] | 35 [33-38] | 0.534 |
| **Gravida (median [25%-75%])** | 2 [1-4] | 3 [1-3,25] | 0.987 |
| **Parity (median [25%-75%])** | 1 [0-2] | 2 [0-2] | 0.700 |
| **Systolic blood pressure (mmHg) (median [25%-75%])** | 145 [128-158] | 115,50 [110-120] | < 0.001 |
| **Diastolic blood pressure (mmHg) (median [25%-75%])** | 88 [80-95,75] | 71,50 [70-80] | < 0.001 |

| Table 2: Laboratory measurements of the study participants | | | |
| --- | --- | --- | --- |
|  | **With preeclampsia**  **(n = 46)** | **With normal blood pressure**  **(n = 46)** | **P** |
| **White blood cell (K/uL)** | 10,5 [9,4-13,6] | 10,05 [8,4-12,8] | 0.103 |
| **Platelet (K/uL)** | 222 [160-268,5] | 215,5 [181,25-252,5] | 0.722 |
| **Blood uric acid (mg/dL)** | 18 [14-25] | 14,5 [10,75-18] | < 0.001 |
| **Creatinine (mg/dL)** | 0,5 [0,42-0,64] | 0,4 [0,35-0,49] | < 0.001 |
| **SCUBE-1 (ng/ml)** | 89,88 [61,19-223,59] | 62,55 [55,79-81,52] | < 0.001 |

Table 3: Cut-off point analysis of SCUBE-1 values to determine preeclampsia

|  | Cut point | AUC | P | Sensivity (%) | 95% CI | Specifity (%) | 95% CI |
| --- | --- | --- | --- | --- | --- | --- | --- |
| SCUBE-1 | >95,92 | 0,716 [0,61-0,81] | <0.001 | 50,00 | 34,9-65,1 | 91,30 | 79,2-97,6 |
